# Supplementary material for: Coupling of Anaerobic Digestion and Struvite Precipitation in the Same Reactor: Effect of Zeolite and Bischofite as Mg2+ Source
Source: Frontiers journal article supplement (doi:10.3389/fenvs.2021.706730), 2021-12-02
Supplement: Image_1.pdf [file Image_1.pdf]

Supplementary data

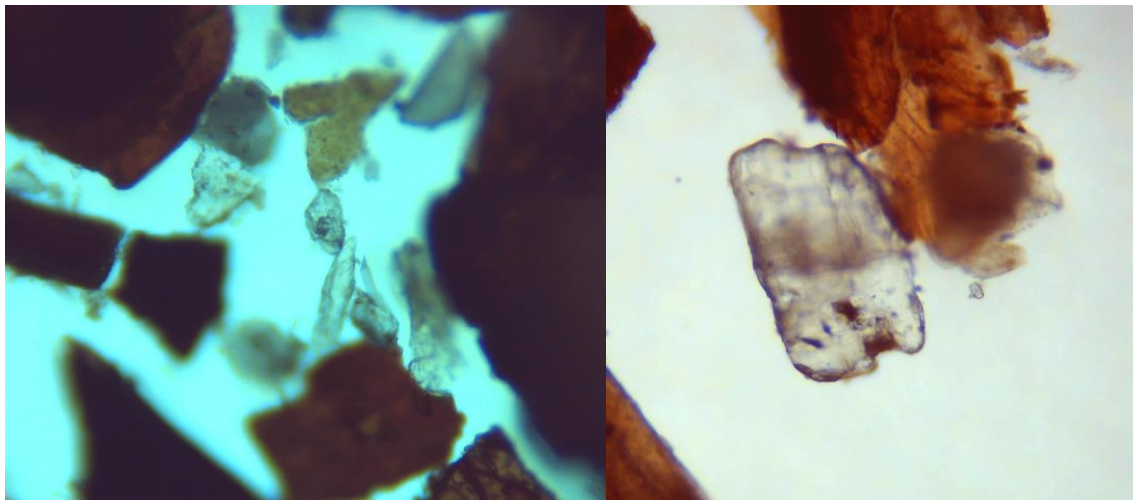

**Figure S1:** Photos of struvite obtained in the bioreactors with an optical microscopy at 25x
